# Supplementary material for: NiSe2/FeSe2 heterostructured nanoparticles supported on rGO for efficient water electrolysis
Source: Royal Society of Chemistry journal article supplement (doi:10.1039/d1qi01473k), 2021-12-14
Supplement: d1qi01473k1.pdf [file d1qi01473k1.pdf]

## Supporting Information

### **NiSe<sub>2</sub>/FeSe<sub>2</sub> heterostructured nanoparticles supported on rGO for efficient catalyst towards water electrolysis**

Muhammad Ahmad,<sup>a</sup> Baojuan Xi,<sup>a</sup> Yu Gu,<sup>a</sup> Hua Zhang<sup>a</sup> and Shenglin Xiong<sup>\*a</sup>

<sup>a</sup> School of Chemistry and Chemical Engineering, State Key Laboratory of Crystal Materials, Shandong University, Jinan, 250100, P. R. China

\*Correspondence author. Email: [chexsl@sdu.edu.cn](mailto:chexsl@sdu.edu.cn) (S.L.X)

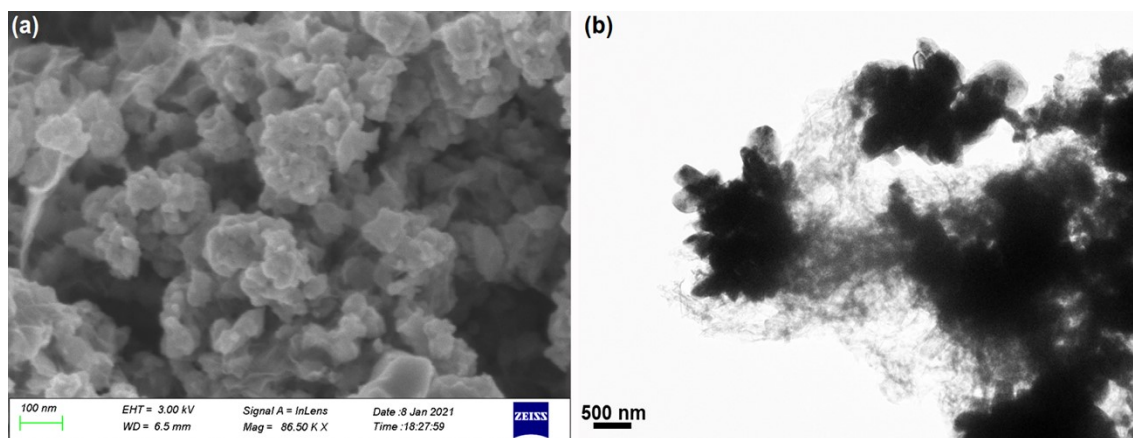

**Figure S1.** (a) FSEM and (b) TEM images of  $\text{FeSe}_2@\text{rGO}$ .

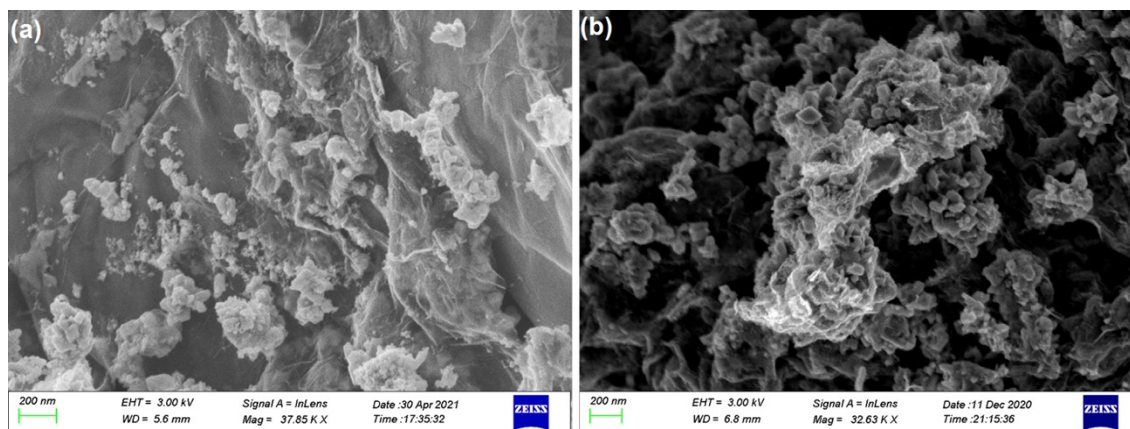

**Figure S2.** (a,b) FESEM images of NiSe<sub>2</sub>@FeSe<sub>2</sub>/rGO-2.

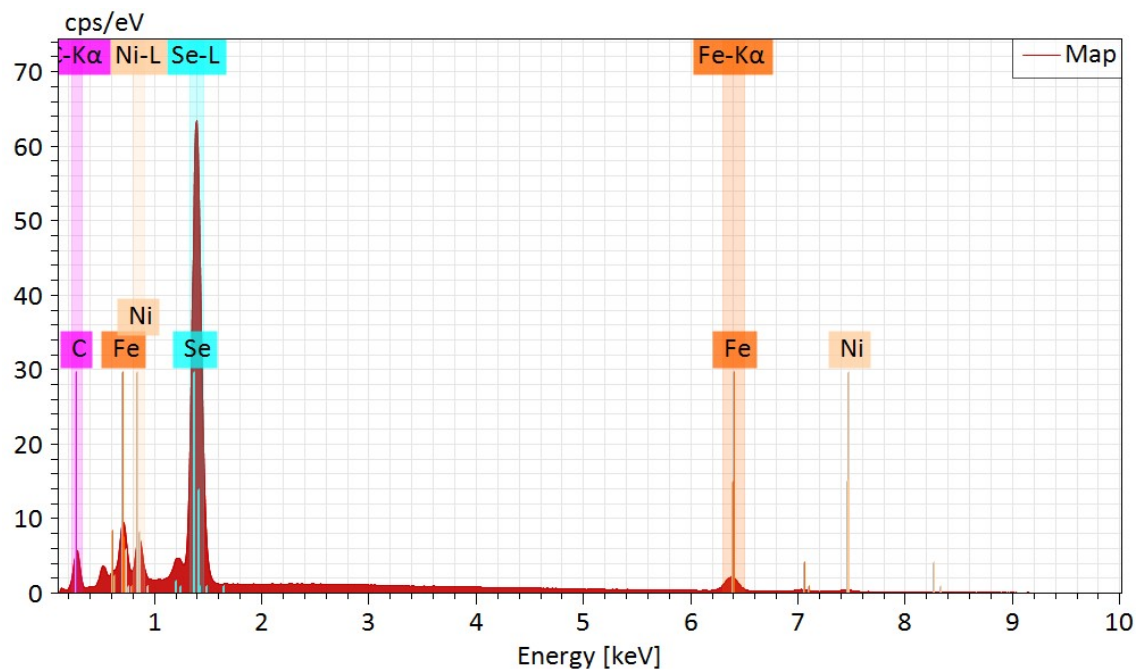

**Figure S3.** EDX spectrum of NiSe<sub>2</sub>@FeSe<sub>2</sub>/rGO-2.

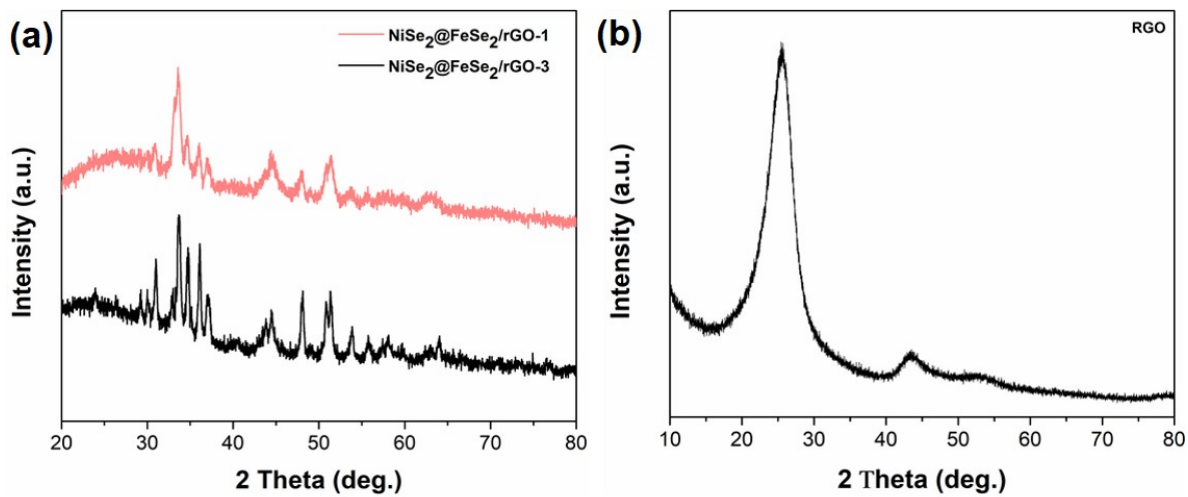

**Figure S4.** XRD patterns of (a) NiSe<sub>2</sub>@FeSe<sub>2</sub>/rGO-1, NiSe<sub>2</sub>@FeSe<sub>2</sub>/rGO-3 and (b) rGO.

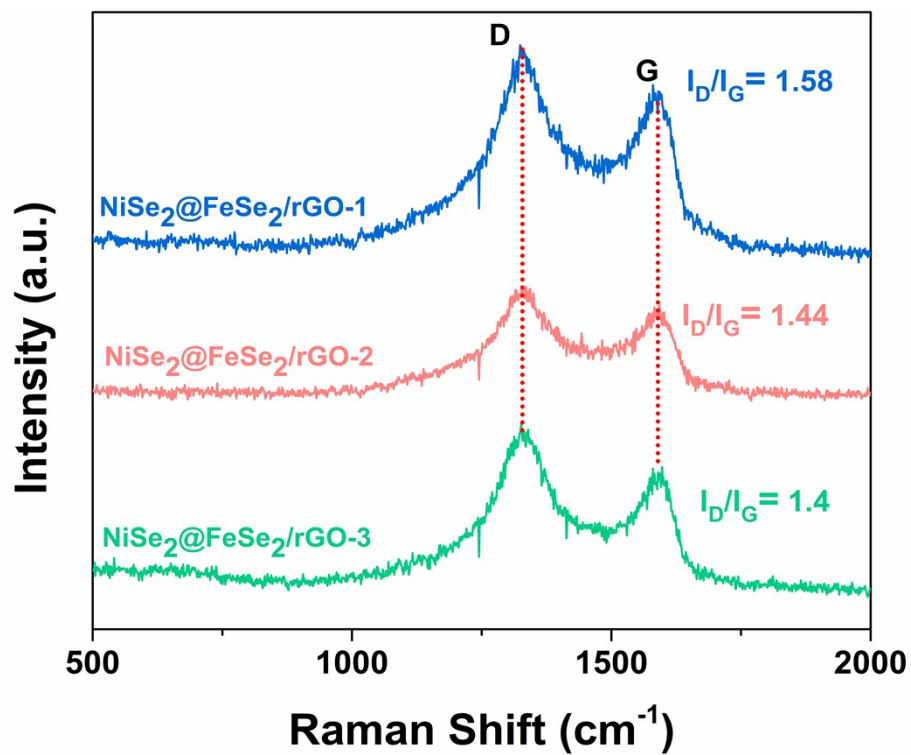

**Figure S5.** Raman spectra of different samples.

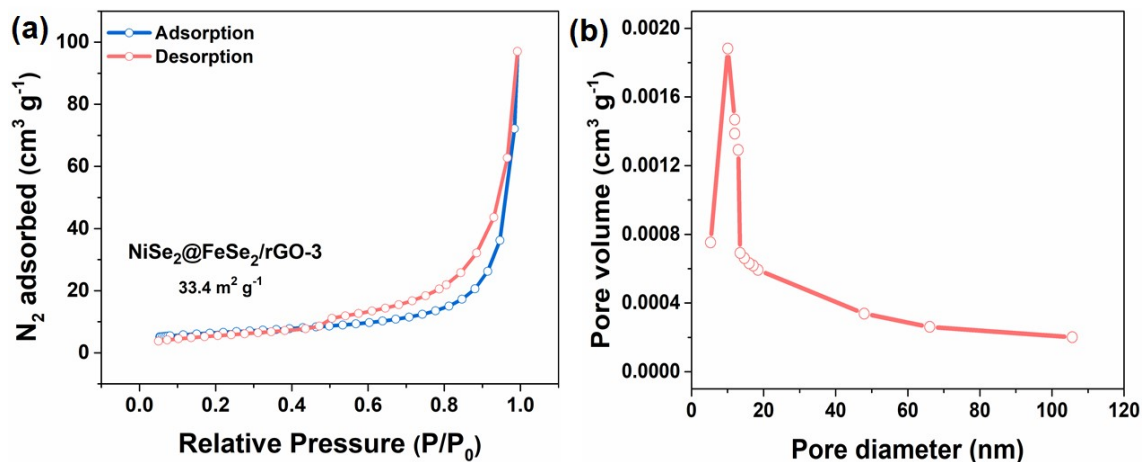

**Figure S6.** (a) N<sub>2</sub> sorption isotherm and (b) corresponding pore size distribution curve of NiSe<sub>2</sub>@FeSe<sub>2</sub>/rGO-3.

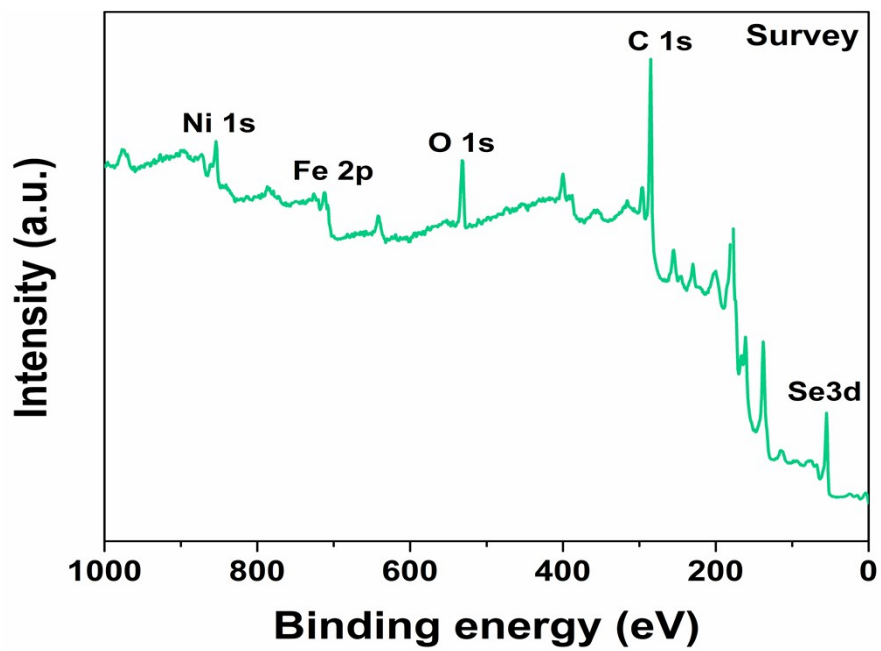

**Figure S7.** Survey spectrum of NiSe<sub>2</sub>@FeSe<sub>2</sub>/rGO-2.



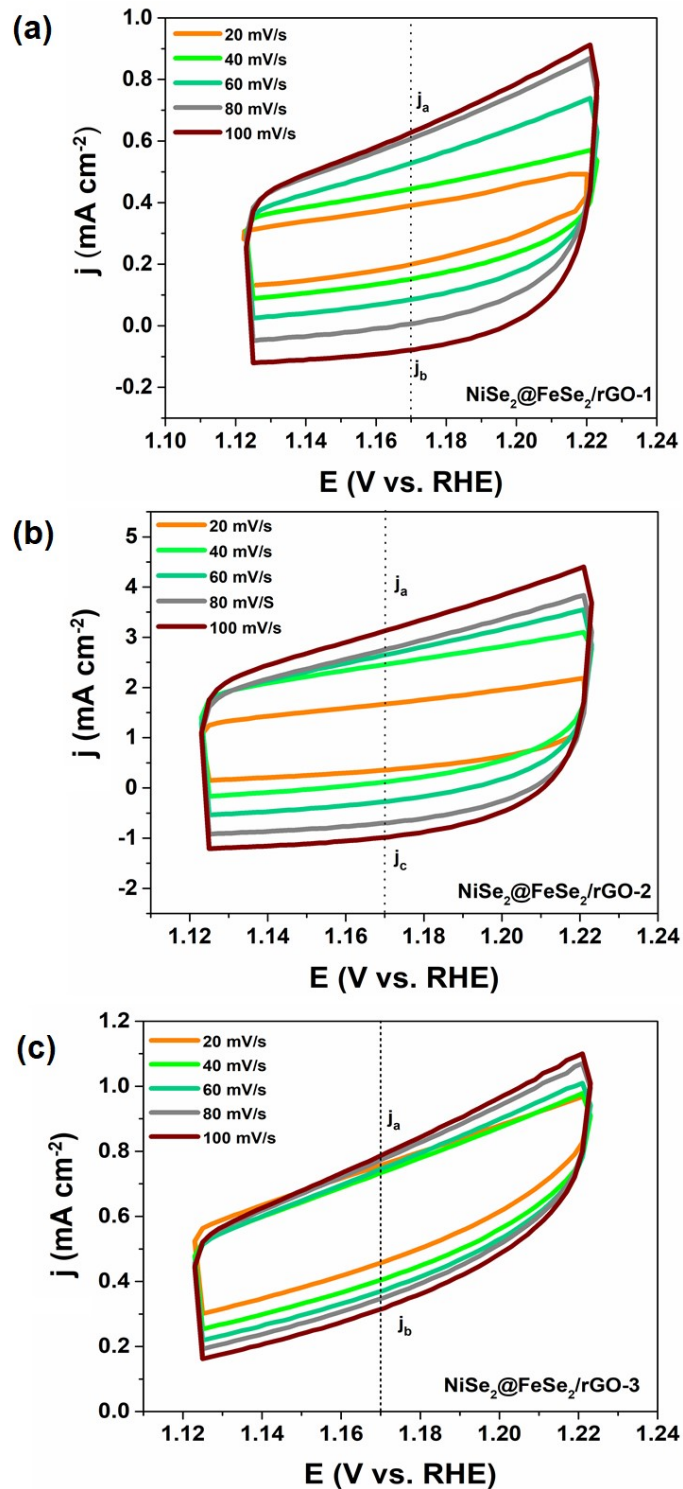

**Figure S8.** Cyclic voltammogram (CV) curves of (a) NiSe<sub>2</sub>@FeSe<sub>2</sub>/rGO-1 (b) NiSe<sub>2</sub>@FeSe<sub>2</sub>/rGO-2 and (c) NiSe<sub>2</sub>@FeSe<sub>2</sub>/rGO-3.

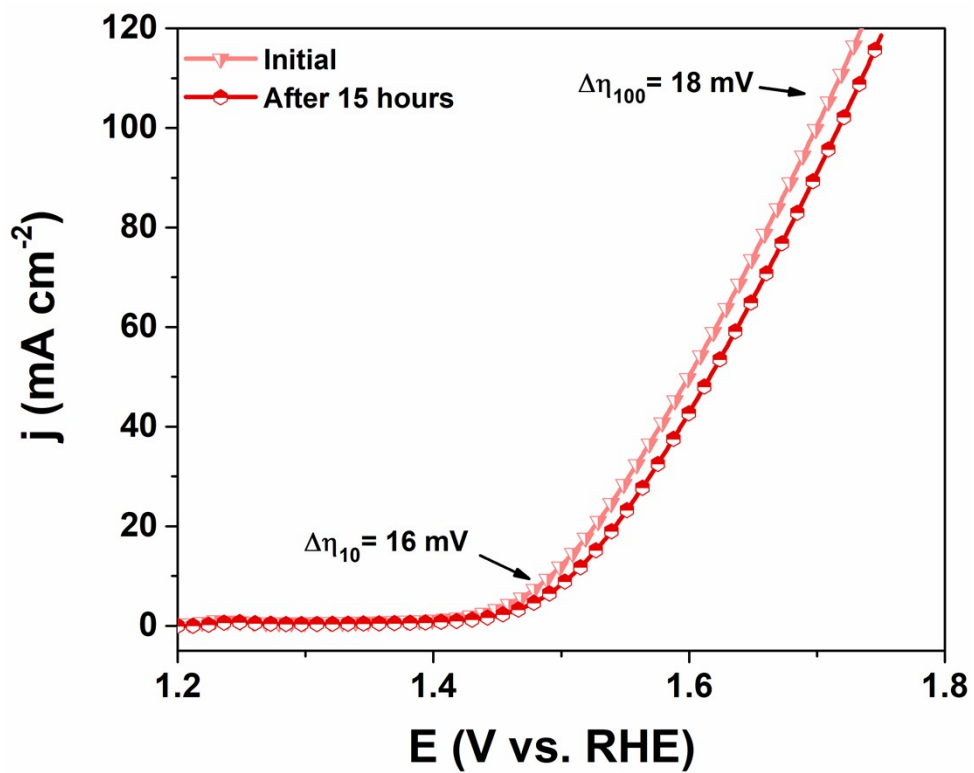

**Figure S9.** LSV curves of NiSe<sub>2</sub>@FeSe<sub>2</sub>/rGO-2 before and after chronoamperometric (i-t) measurements for OER.

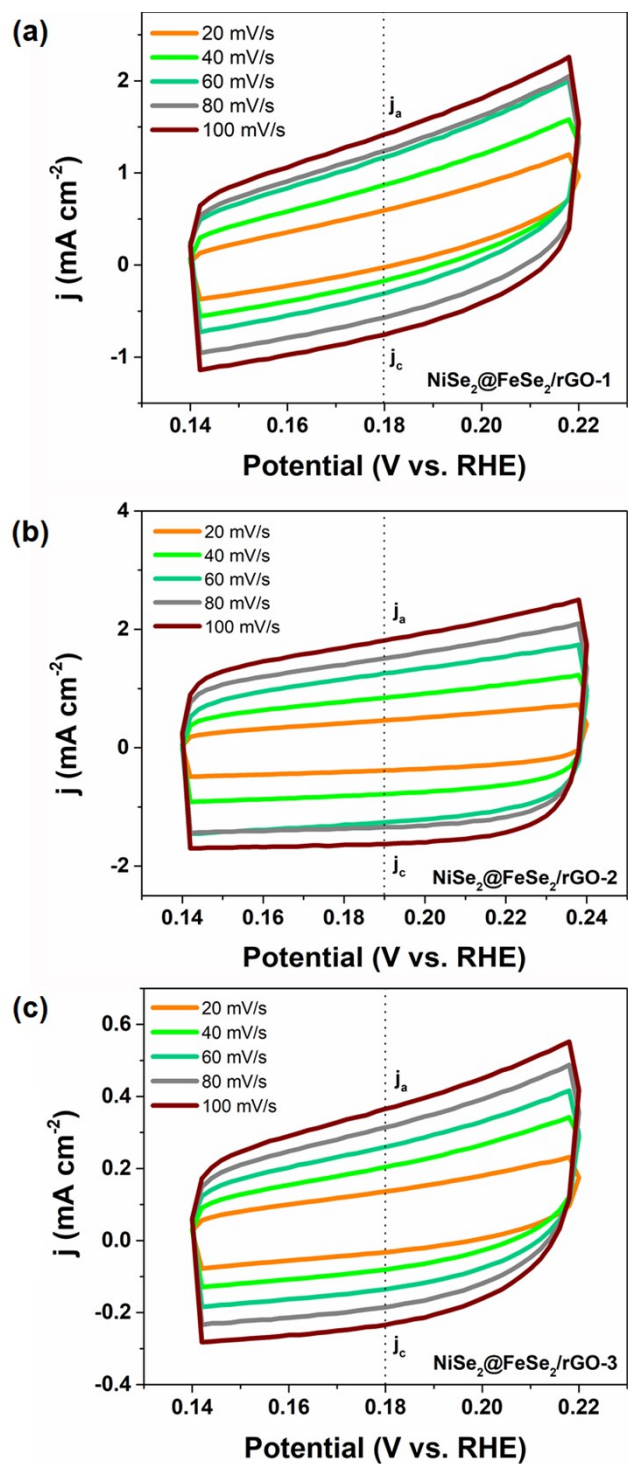

**Figure S10.** Cyclic voltammogram curves of (a)  $\text{NiSe}_2@FeSe_2/rGO-1$  (b)  $\text{NiSe}_2@FeSe_2/rGO-3$  and (c)  $\text{NiSe}_2@FeSe_2/rGO-2$ .

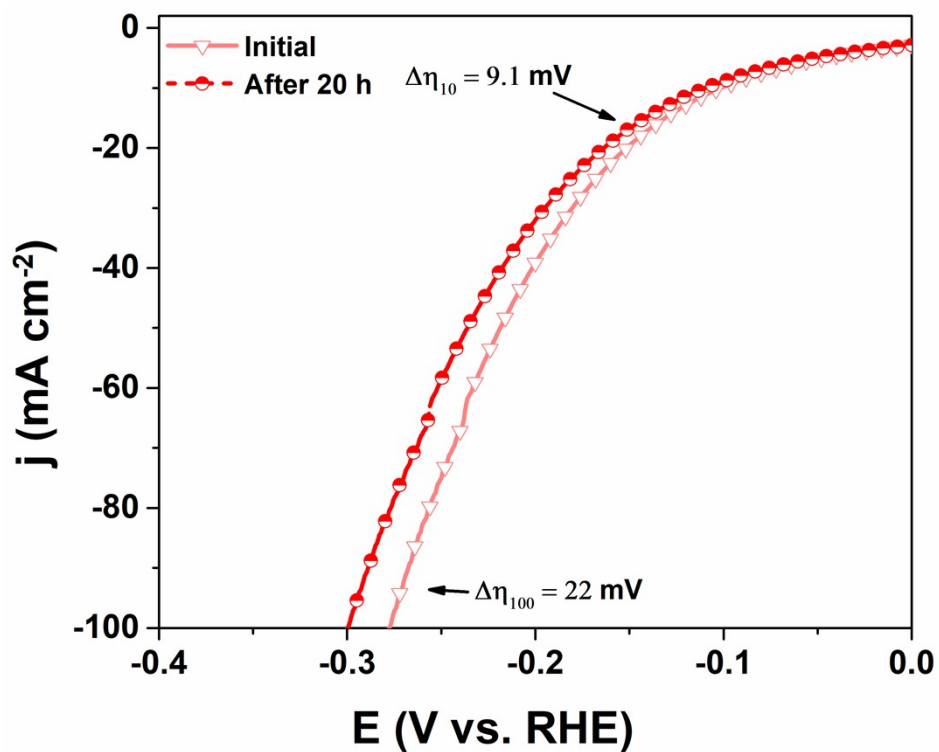

**Figure S11.** LSV curves of of NiSe<sub>2</sub>@FeSe<sub>2</sub>/rGO-2 recorded before and after chronoamperometric (i-t) measurements for HER.

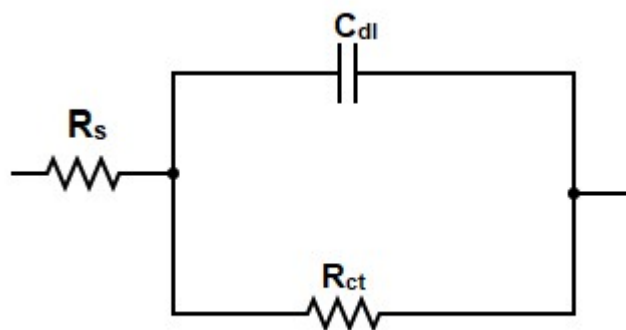

**Figure S12.** Equivalent circuit employed to calculate  $R_{ct}$ .

**Table S1.** Comparison of OER performances with previously reported catalysts.

| Catalysts                                                            | Current density<br>$j$ (mA cm <sup>-2</sup> ) | Overpotential<br>$\eta$ (mV) | Refs.            |
|----------------------------------------------------------------------|-----------------------------------------------|------------------------------|------------------|
| NiSe <sub>2</sub> @FeSe <sub>2</sub> /rGO                            | 10                                            | 260                          | <b>This work</b> |
| Ni <sub>0.85</sub> Se/GS                                             | 10                                            | 302                          | [S1]             |
| Ti@Ni <sub>0.85</sub> Se                                             | 30                                            | 270                          | [S2]             |
| NiSe-Ni <sub>0.85</sub> Se/CP                                        | 10                                            | 300                          | [S3]             |
| FeNi <sub>3</sub> @NC                                                | 10                                            | 277                          | [S4]             |
| Co <sub>0.95</sub> Cr <sub>0.05</sub> Fe <sub>2</sub> O <sub>4</sub> | 10                                            | 293.3                        | [S5]             |
| Co <sub>3</sub> O <sub>4</sub>                                       | 10                                            | 297                          | [S6]             |
| NiSe@NiOOH/NF                                                        | 50                                            | 332                          | [S7]             |
| NiCo <sub>2</sub> S <sub>4</sub> /RGO                                | 10                                            | 366                          | [S8]             |
| Co-Mo-B                                                              | 10                                            | 320                          | [S9]             |
| $\beta$ -Ni(OH) <sub>2</sub>                                         | 10                                            | 340                          | [S10]            |
| Fe <sub>0.08</sub> Ni <sub>0.77</sub> Se                             | 10                                            | 245                          | [S11]            |

**Table S2.** Comparison of HER performances with previously reported catalysts.

| Catalysts                                                 | Current density<br>$j$ (mA cm <sup>-2</sup> ) | Overpotential<br>$\eta$ (mV) | Refs.            |
|-----------------------------------------------------------|-----------------------------------------------|------------------------------|------------------|
| NiSe <sub>2</sub> @FeSe <sub>2</sub> /rGO                 | 10                                            | 101                          | <b>This work</b> |
| Ni <sub>0.85</sub> Se/GS                                  | 10                                            | 200                          | [S1]             |
| Ti@Ni <sub>0.85</sub> Se                                  | 30                                            | 120                          | [S2]             |
| NiSe-Ni <sub>0.85</sub> Se/CP                             | 10                                            | 101                          | [S3]             |
| Fe <sub>0.08</sub> Ni <sub>0.77</sub> Se/CNT <sub>3</sub> | 10                                            | 108                          | [S11]            |
| Ni <sub>2</sub> Fe <sub>2</sub> N/Ni <sub>3</sub> Fe      | 10                                            | 74                           | [S12]            |
| SnS <sub>2</sub> -MoS <sub>2</sub>                        | 10                                            | 240                          | [S13]            |
| 2D i-WC-G                                                 | 10                                            | 120                          | [S14]            |
| Co@CNF                                                    | 10                                            | 196                          | [S15]            |
| Ni <sub>1</sub> Co <sub>1</sub> -P                        | 10                                            | 169                          | [S16]            |
| Mo <sub>2</sub> C@NC@MoS <sub>x</sub>                     | 10                                            | 249                          | [S17]            |

**Table S3** Comparison of overall watersplitting performances with previously reported catalysts.

| catalysts                                                 | current density<br>$j$ (mA cm <sup>-2</sup> ) | overall water splitting<br>performance (V) | Refs.            |
|-----------------------------------------------------------|-----------------------------------------------|--------------------------------------------|------------------|
| NiSe <sub>2</sub> @FeSe <sub>2</sub> /rGO                 | 10                                            | 1.57                                       | <b>This work</b> |
| Ni <sub>0.85</sub> Se/GS                                  | 10                                            | 1.7                                        | [S1]             |
| Ti@Ni <sub>0.85</sub> Se                                  | 10                                            | 1.66                                       | [S2]             |
| NiSe-Ni <sub>0.85</sub> Se/CP                             | 10                                            | 1.62                                       | [S3]             |
| Fe <sub>0.08</sub> Ni <sub>0.77</sub> Se/CNT <sub>3</sub> | 10                                            | 1.53                                       | [S11]            |
| NiMoP <sub>2</sub>                                        | 10                                            | 1.5                                        | [S18]            |
| NiS/Ni <sub>2</sub> P/CC                                  | 10                                            | 1.67                                       | [S19]            |
| $\alpha$ -Co(OH) <sub>2</sub>                             | 10                                            | 1.72                                       | [S20]            |
| $\alpha$ -NiOOH                                           | 10                                            | 1.66                                       | [S21]            |
| Ni-Fe-P                                                   | 10                                            | 1.486                                      | [S22]            |
| MoO <sub>2</sub>                                          | 30                                            | 1.65                                       | [S23]            |

## References

- [1] X. Wu, D. He, H. Zhang, H. Li, Z. Li, B. Yang, Z. Lin, L. Lei and X. Zhang, Ni<sub>0.85</sub>Se as an efficient non-noble bifunctional electrocatalyst for full water splitting, *Int. J. Hydrogen Energy*, 2016, **41**, 10688–10694.
- [2] C. Yang, J. Zhang, G. Gao, D. Liu, R. Liu, R. Fan and Y. Wang, 3D Metallic Ti@Ni<sub>0.85</sub>Se with triple hierarchy as high-efficiency electrocatalyst for overall water splitting, *ChemSusChem*, 2019, **12**, 2271–2277.

- [3] Y. Chen, Z. Ren, H. Fu, X. Zhang, G. Tian and H. Fu, NiSe-Ni<sub>0.85</sub>Se heterostructure nanoflake arrays on carbon paper as efficient electrocatalysts for overall water splitting, *Small* 2018, **14**, e1800763.
- [4] D. Chen, J. Zhu, X. Mu, R. Cheng, W. Li, S. Liu, Z. Pu, C. Lin and S. Mu, Nitrogen-Doped carbon coupled FeNi<sub>3</sub> intermetallic compound as advanced bifunctional electrocatalyst for OER, ORR and zn-air batteries, *Appl. Catal. B* 2020, **268**, 118729.
- [5] S. Pan, J. Yu, Y. Zhang and B. Li, Pulsed laser deposited Cr-doped CoFe<sub>2</sub>O<sub>4</sub> thin film as highly efficient oxygen evolution reaction electrode, *Mater. Lett.* 2020, **262**, 127027.
- [6] J. Du, C. Li and Q. Tang, Oxygen vacancies enriched Co<sub>3</sub>O<sub>4</sub> nanoflowers with single layer porous structures for water splitting, *Electrochim. Acta* 2020, **331**, 135456.
- [7] X. Li, G. -Q. Han, Y.-R. Liu, B. Dong, W. -H. Hu, X. Shang, Y. -M. Chai and C.-G. Liu, NiSe@NiOOH coreshell hyacinth-like nanostructures on nickel foam synthesized by in situ electrochemical oxidation as an efficient electrocatalyst for the oxygen evolution reaction, *ACS Appl. Mater. Interfaces*, 2016, **8**, 20057–20066.
- [8] C. Shuai, Z. Mo, X. Niu, X. Yang, G. Liu, J. Wang, N. Liu and R. Guo, Hierarchical NiCo<sub>2</sub>S<sub>4</sub> nanosheets grown on graphene to catalyze the oxygen evolution reaction, *J. Mater. Sci.*, 2020, **55**, 1627–1636.



- [9] S. Gupta, N. Patel, R. Fernandes, S. Hanchate, A. Miotello and D.C. Kothari, Co-Mo-B nanoparticles as a non-precious and efficient bifunctional electrocatalyst for hydrogen and oxygen evolution, *Electrochim. Acta*, 2017, **232**, 64–71.
- [10] N. Kim, D. Lim, Y. Choi, S.E. Shim and S.-H. Baeck,  $\beta$ -Ni(OH)<sub>2</sub> nanoplates with oxygen vacancies as efficient catalysts for the oxygen evolution reaction, *Electrochim. Acta*, 2019, **324**, 134868.
- [11] G. Liu, C. Shuai, Z. Mo, R. Guo, N. Liu, Q. Dong, J. Wang, H. Pei, W. Liu and X. Guo, Fe-doped Ni<sub>0.85</sub>Se nanospheres interspersed into carbon nanotubes as efficient and stable electrocatalyst for overall water splitting, *Electrochim. Acta*, 2021, **385**, 138452.
- [12] Y. Hu, T. Xiong, M.-S.J.T. Balogun, Y. Huang, D. Adekoya, S. Zhang and Y. Tong, Enhanced metallicity boosts hydrogen evolution capability of dual-bimetallic Ni–Fe nitride nanoparticles *Mater. Today Phys.*, 2020, **15**, 100267.
- [13] T. Ali, X. Wang, K. Tang, Q. Li, S. Sajjad, S. Khan, S.A. Farooqi and C. Yan, SnS<sub>2</sub> quantum dots growth on MoS<sub>2</sub>: atomic-level heterostructure for electrocatalytic hydrogen evolution, *Electrochim. Acta*, 2019, **300**, 45–52.
- [14] M. Zeng, Y. Chen, J. Li, H. Xue, R.G. Mendes, J. Liu, T. Zhang, M.H. Rummeli and L. Fu, 2D WC single crystal embedded in graphene for enhancing hydrogen evolution reaction, *Nano Energy*, 2017, **33**, 356–362.
- [15] H. Su, H.-H. Wang, B. Zhang, K.-X. Wang, X.-H. Li and J.-S. Chen, Enriching Co nanoparticles inside carbon nanofibers via nanoscale assembly of metal–organic complexes for highly efficient hydrogen evolution, *Nano Energy*, 2016, **22**, 79–86.

- [16] C. Shuai, Z. Mo, X. Niu, P. Zhao, Q. Dong, Y. Chen, N. Liu and R. Guo, Nickel/cobalt bimetallic phosphides derived metal-organic frameworks as bifunctional electrocatalyst for oxygen and hydrogen evolution reaction, *J. Alloys Compd.*, 2020, **847**, 156514.
- [17] J. -Q. Chi, X. Shang, S. -S. Lu, B. Dong, Z. -Z. Liu, K. -L. Yan, W. -K. Gao, Y. -M. Chai and C.-G. Liu, Mo<sub>2</sub>C@NC@MoS<sub>x</sub> porous nanospheres with sandwich shell based on MoO<sub>4</sub><sup>2-</sup>-polymer precursor for efficient hydrogen evolution in both acidic and alkaline media, *Carbon*, 2017, **124**, 555–564.
- [18] X. -D. Wang, H.-Y. Chen, Y.-F. Xu, J.-F. Liao, B.-X. Chen, H.-S. Rao, D.-B. Kuang and C.-Y. Su, Self-supported NiMoP<sub>2</sub> nanowires on carbon cloth as an efficient and durable electrocatalyst for overall water splitting, *J. Mater. Chem. A* 2017, **5**, 7191–7199.
- [19] X. Xiao, D. Huang, Y. Fu, M. Wen, X. Jiang, X. Lv, M. Li, L. Gao, S. Liu, M. Wang, C. Zhao and Y. Shen, Engineering NiS/Ni<sub>2</sub>P heterostructures for efficient electrocatalytic water splitting, *ACS Appl. Mater. Interfaces* 2018, **10**, 4689–4696.
- [20] P. Guo, J. Wu, X. -B. Li, J. Luo, W. -M. Lau, H. Liu, X. -L. Sun and L.-M. Liu, A highly stable bifunctional catalyst based on 3D Co(OH)<sub>2</sub>@NCNTs@NF towards overall water-splitting, *Nano Energy*, 2018, **47**, 96–104.
- [21] Q. Zhang, C. Zhang, J. Liang, P. Yin and Y. Tian, Orthorhombic α-NiOOH nanosheet arrays: phase conversion and efficient bifunctional electrocatalysts for full Water splitting, *ACS Sustain. Chem. Eng.*, 2017, **5**, 3808–3818.

- [22] C. Xuan, Z. Peng, K. Xia, J. Wang, W. Xiao, W. Lei, M. Gong, T. Huang and D. Wang, Self-supported ternary Ni-Fe-P nanosheets derived from metal-organic frameworks as efficient overall water splitting electrocatalysts, *Electrochim. Acta*, 2017, **258**, 423–432.
- [23] W. Wang, Z. Yang, F. Jiao and Y. Gong, (P, W)-co doped MoO<sub>2</sub> nanoflowers on nickel foam as an efficient bifunctional electrocatalyst for overall water splitting, *Appl. Surf. Sci.* 2020, **529**, 146987.
